# Supplementary material for: Evaluation of Adaptive Feedback in a Smartphone-Based Serious Game on Health Care Providers’ Knowledge Gain in Neonatal Emergency Care: Protocol for a Randomized Controlled Trial
Source: PubMed Central journal article supplement (PMC6688438; doi:10.2196/13034), 2019-07-26
Supplement: resprot_v8i7e13034_app1.pdf [file resprot_v8i7e13034_app1.pdf]

1 **Sample size calculation:**

2 Suppose k groups each have a normal distribution and equal means ( $\mu_1 = \mu_2 = \dots = \mu_k$ ). Let  $n_1 =$   
3  $n_2 = \dots = n_k$  denote the number of subjects in each group and let N denote the total sample size of  
4 all groups. Let  $\mu_w$  denote the weighted mean of all groups i.e.

6 
$$\mu_w = \sum_{i=1}^k \left(\frac{n_i}{N}\right) \mu_i \quad (4)$$

7 Where:

8  $n_i$  = number of observations in group  $i$

9 N = total number of observations

10  $\mu_i$  = the mean of group  $i$

11

12 The ratio of the mean square between groups to the mean square within groups is a F-distribution,  
13 with two parameters matching the degrees of freedom of the numerator mean square and the  
14 denominator mean square. When the null hypothesis of mean equality is rejected, that ratio has a  
15 noncentral F-distribution which is dependent on the non-centrality parameter,  $\lambda$  calculated as:

16 
$$\lambda = N \frac{\sigma_m^2}{\sigma^2} \quad (5)$$

17 Where:

18  $\sigma^2$  = error variance within groups

19  $\sigma_m^2$  = error variance between groups

20

21 and

22 
$$\sigma_m^2 = \sum_{i=1}^k \frac{n_i (\mu_i - \mu_w)^2}{N} \quad (6)$$

23 Power of the study is calculated as:

24 
$$Power = 1 - F(f_\alpha; k - 1, v, \lambda) \quad (7)$$

25 Where:

26  $\nu$  = degrees of freedom for the error, equal to  $k * (n_i - 1)$

27  $k$  = number of levels (groups).

28  $F(f_\alpha; k - 1, \nu, \lambda)$  = a continuous distribution function of F-distribution, with  $k-1$  degrees of freedom  
29 for the numerator,  $\nu$  denominator degrees of freedom, and the non-centrality parameter evaluated  
30 at  $f_\alpha$

31 Within R statistical language, to derive the required sample size, this is easily translated to:

32 `library(pwr)`

33 `pwr.anova.test(k = 2, f = .22, sig.level = .05, power = .8)`

34 The effect size used for the power calculation is based on education literature where similar  
35 interventions in other subject domains using the experimental study design have been found to have  
36 an mean effect size of 0.22 (95% CI: 0.16 – 0.27) from a meta-analytic fixed-effects model [24].

37

38 Learning gains defined as the amount healthcare providers learned divided by the amount they could  
39 have learned [40], will be calculated with the formula given below:

40

$$41 \quad Learning\ gain\ (c) = \begin{cases} \frac{post - pre}{100 - pre} & post > pre \\ drop & post = pre = 100 = 0 \\ 0 & post = pre \\ \frac{post - pre}{pre} & post < pre \end{cases} \quad (8)$$

42

43 This helps to minimise the low test-score bias in calculation of individual health providers knowledge  
44 gain and makes interpretation of learning scores is straightforward by ensuring the learning gain  
45 neither falls within a non-symmetric range of scores nor includes infinity values [40]. These limitations  
46 are present in simplified calculations of gain score e.g. gain=post-score – pre-score [40].

47
